# Supplementary material for: Earth observation reveals reduced winter wheat growth and the importance of soil water storing capacity during drought
Source: Copernicus journal article supplement (doi:10.5194/egusphere-2024-1872), 2024-07-04
Supplement: Supplementary file 1 [file egusphere-2024-1872-supplement.pdf]

# Supplementary material

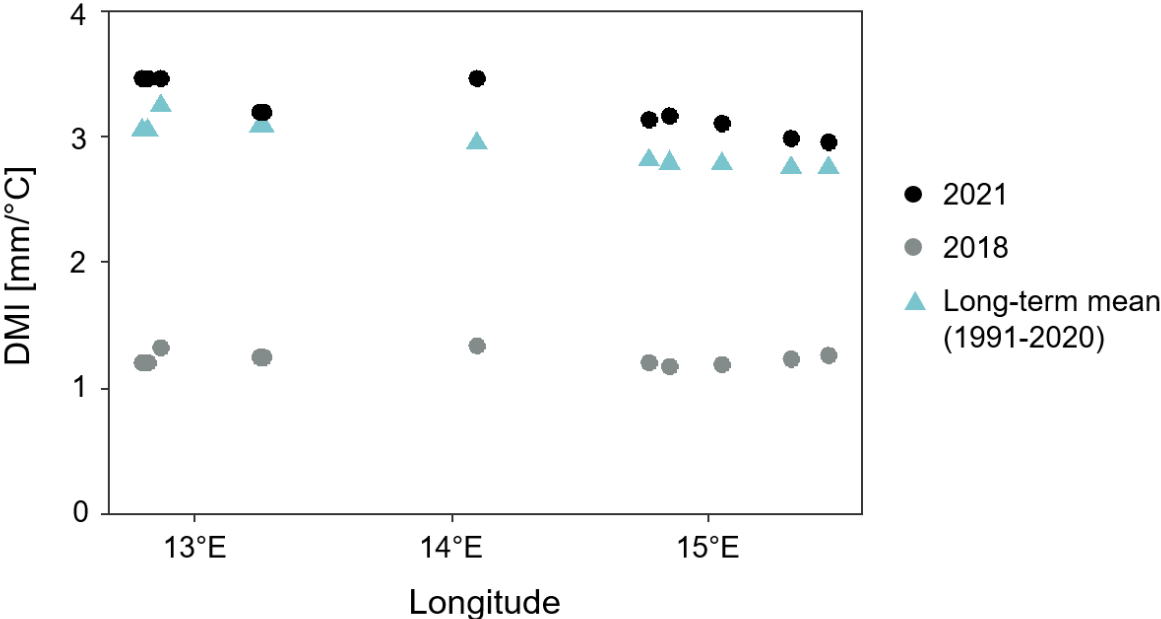

**Fig. S1.** The average DMI (De Martonne Aridity Index) during the summer months (May-July) for the 13 fields, and the long-term mean between 1991 and 2020 for the locations of the same fields.

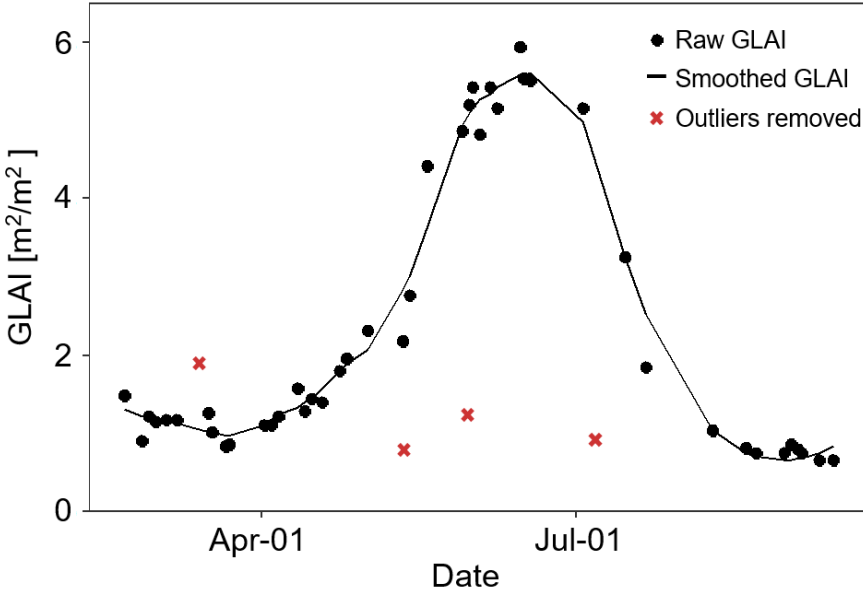

**Fig. S2.** Example of the temporal development of the green leaf area index (GLAI) with smoothed GLAI (black line), raw GLAI values (black dots), and removed outliers (red crosses).

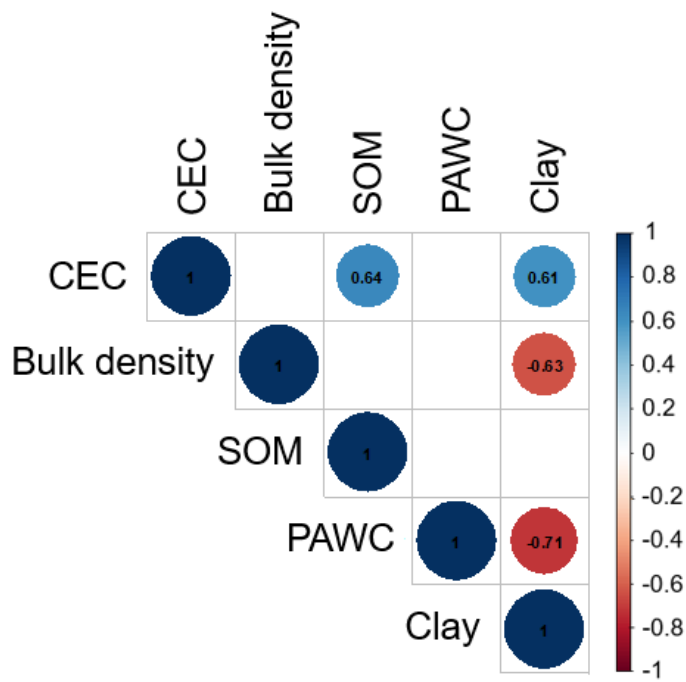

**Fig. S3.** Spearman correlation coefficients between the soil properties CEC (cation exchange capacity), clay content, SOM (soil organic matter content), plant available water capacity (PAWC) and bulk density. Red colour indicates a negative and blue colour a positive correlation coefficient.

**Tab. S1.** Ranges and distributions for combinations of leaf (PROSPECT-D) and canopy (4SAIL) parameters according to a uniform or Gaussian distribution. Mean and standard deviation are indicated in brackets.

| Trait             | Description                  | Unit                           | Range                       |
|-------------------|------------------------------|--------------------------------|-----------------------------|
| PROSPECT-D (Leaf) |                              |                                |                             |
| <b>N</b>          | Leaf Structure Parameter     | [-]                            | 1–2.5 (1.5, 0.2)            |
| <b>Cab</b>        | Leaf Chlorophyll a+b Content | [ $\mu\text{g cm}^{-2}$ ]      | redistributed based on GLAI |
| <b>Car</b>        | Leaf Carotenoid Content      | [ $\mu\text{g cm}^{-2}$ ]      | redistributed based on Cab  |
| <b>Cant</b>       | Leaf Anthocyanin Content     | [ $\mu\text{g cm}^{-2}$ ]      | 0.0–5.0 (2.0, 0.8)          |
| <b>Cbrown</b>     | Brown Pigments               | [-]                            | 0–1                         |
| <b>Cw</b>         | Equivalent Water Thickness   | [cm]                           | 0–0.07 (0.04, 0.02)         |
| <b>Dm</b>         | Dry Matter Content           | [ $\text{g cm}^{-2}$ ]         | 0–0.01                      |
| 4SAIL (Canopy)    |                              |                                |                             |
| <b>GLAI</b>       | Green Leaf Area Index        | [ $\text{m}^2 \text{m}^{-2}$ ] | 0–8                         |
| <b>ALA</b>        | Leaf Inclination Angle       | [deg]                          | 30–70                       |
| <b>hspot</b>      | Hot spot Parameter           | [-]                            | 0.01–0.5                    |
| <b>rsoil</b>      | Soil Brightness Factor       | [-]                            | 0–1                         |
| <b>psoil</b>      | Dry/Wet Soil Factor          | [-]                            | 0–1                         |

**Table S1.** Minimum, maximum, and mean values of the measured soil properties across all fields. CEC: cation exchange capacity, clay: clay content, SOM: soil organic matter content, PAWC: plant available water capacity, and bulk density.

|                                     | Minimum | Maximum | Mean |
|-------------------------------------|---------|---------|------|
| CEC [ $\text{cmol kg}^{-1}$ ]       | 10.3    | 28.6    | 16.3 |
| Clay [%]                            | 10.5    | 58.5    | 31.3 |
| SOM [%]                             | 2.3     | 5.7     | 3.6  |
| PAWC [%]                            | 19.4    | 26.2    | 23.0 |
| Bulk density [ $\text{g cm}^{-3}$ ] | 1.3     | 1.7     | 1.5  |
